# Supplementary material
Source: PubMed Central journal article supplement (PMC5714788)
Supplement: ajtr0009-5040-f5.pdf [file ajtr0009-5040-f5.pdf]

## CAP and cardiomyopathy

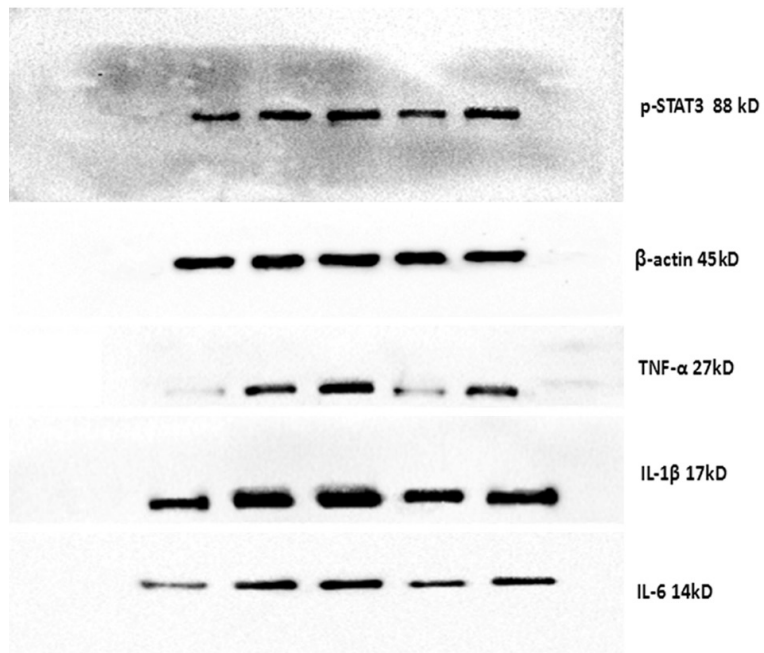

**Supplementary Figure 1.** Western blot analysis of p-STAT3, TNF- $\alpha$  27, IL-1 $\beta$  and IL-6 in cardiac tissue.
